# Supplementary material
Source: publisher figshare collection journal article supplement (https://karger.figshare.com/ndownloader/files/30642816)
Supplement: Supplementary file 1 [file 30642816]

**Figure legends**

**Fig. S1** Study participant flowchart. DN: diabetic nephropathy; NDRD: non-diabetic nephropathy; Mixed: DN with NDRD; eGFR: estimated glomerular filtration rate

**Fig. S2** Calibration plots for a nomogram predicting renal survival in diabetic nephropathy patients. Calibration curves show (A) 3-year and (B) 5-year outcomes. Odds of renal survival based on nomogram predictions are shown on the x-axis, with actual renal survival on the y-axis
